# Supplementary material for: The RNA-Binding and RNA-Melting Activities of the Multifunctional Protein Nucleobindin 1
Source: MDPI journal article supplement (doi:10.3390/ijms24076193), 2023-03-24
Supplement: s1 [file s1]

## Supplementary materials

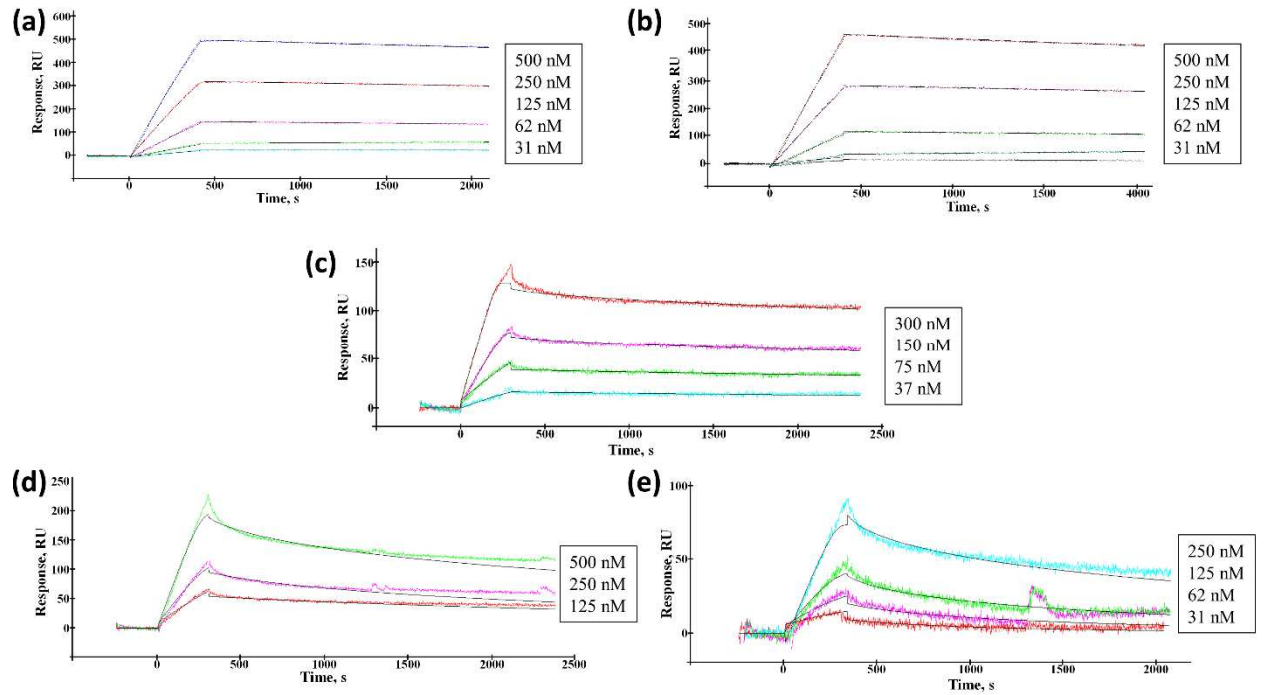

Figure S1. Sensograms showing binding kinetics for the NUCB1-RNA fragments: (a) NUCB1 with U-rich RNA, (b) NUCB1 with A-rich RNA, (c) NUCB1 with G-rich RNA, (d) NUCB1 with SRP19 mRNA, (e) NUCB1 with E-box RNA. The analyte concentrations used for each data set are shown. Grey lines represent the global fit of the data sets using a 1:1 model.

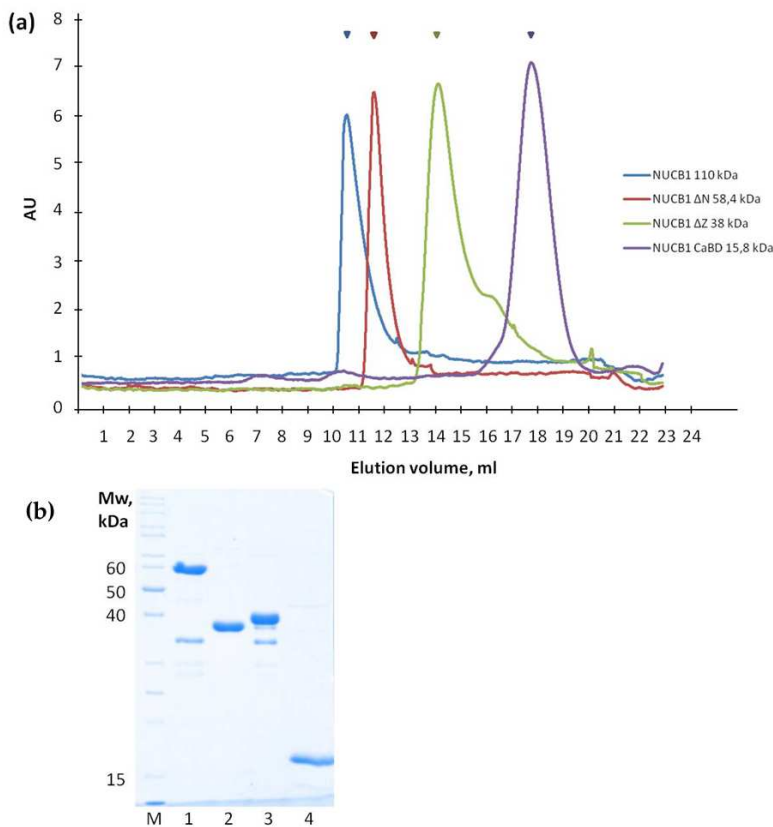

Figure S2. Purification of NUCB1 and its truncated forms. (a) Elution profiles of size exclusion chromatography on the HiLoad Superdex 200 16/60 column of NUCB1 and its truncated forms. The centers

of elution peaks indicate by triangles, molecular weights of proteins are indicated next to the names. (b) Analyzing protein preparations by SDS-PAGE. Lane M – protein size marker, lane 1 – NUCB1, lane 2 – NUCB1  $\Delta$ N, lane 3 – NUCB1  $\Delta$ Z, lane 4 – NUCB1 CaBD.

**Table.S1.** Primers used in this study.

| Name                 | Sequence, 5'→3'                            |
|----------------------|--------------------------------------------|
| For NUCB1            | GCGGATCCGAATTCCGAGGGGCGCCCAACAAGGAGGAG     |
| Rev NUCB1            | GCGGCCGCAAGCTTTCACAGATGCTGGGGCACCTC        |
| For NUCB1 $\Delta$ N | GCGGATCCGAATTTCGACCCCAACAGGTTTAACCCCAAG    |
| Rev NUCB1 $\Delta$ Z | CACCCCAAGCTTTTAGGATGCGAGGAACTCCTCCAG       |
| For NUCB1 CaBD       | ATTATCCGAATTCTTGAAGGAGGTGTGGGAGGAGCTG      |
| Rev NUCB1 CaBD       | CACCCCAAGCTTTTATCAAACTCCTTCCTCTGAGTGG      |
| For E-box RNA        | TAATACGACTCACTATAGGGCGCAGCGAGTTTCTCTCTTTTC |
| Rev E-box RNA        | GGATCCATTATTATCCCCACGTGAAAAGAGAGAAAC       |
| For SRP19            | TAATACGACTCACTATAGGAGGTGCCGAAGTCGTGGGAGG   |
| Rev SRP19            | CGCCGCGGATCCCTATTACCCGACTTCCTCCTCCACGACTTC |
| For miR-200a-3p      | TAATACGACTCACTATAGGGTACCGAGCTCGAATT        |
| Rev miR-200a-3p      | ACATCGTTACCAGACAGTGTTAAATTCGAGCTCGGTACCC   |
| Cy5-primer           | Cy5-GAATTCGAGCTCGGTACCC                    |
